# Supplementary material for: The Paris pledges and the energy-water-land nexus in Latin America: Exploring implications of greenhouse gas emission reductions
Source: PLOS journal article supplement (doi:10.1371/journal.pone.0215013), 2019-04-16
Supplement: S1 (10.1371/journal.pone.0215013.s001) [file journal.pone.0215013.s001]

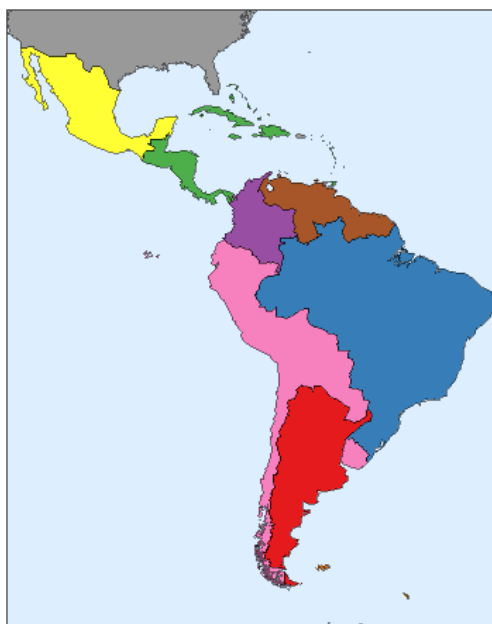

GCAM representation of the 7 Latin American regions: Argentina (red), Brazil (blue), Central America and Caribbean (green), Colombia (purple), Mexico (yellow), South America Northern (brown), and South America Southern (magenta).
